# Supplementary material for: Sensitive determination of thiram in apple samples using a ZIF-67 modified Si/Au@Ag composite as a SERS substrate
Source: Royal Society of Chemistry journal article supplement (doi:10.1039/d3ay01338c), 2023-01-01
Supplement: d3ay01338c1.pdf [file d3ay01338c1.pdf]

## Supplementary Material

### **Sensitive determination of thiram in apple samples using ZIF-67 modified Si/Au@Ag composite as SERS substrate**

Rui Yang, Baowen Zhang, Ya Wang, Yi Zheng, Qian Zhang\*, Xiupei Yang\*

*College of Chemistry and Chemical Engineering, Chemical Synthesis and Pollution  
Control Key Laboratory of Sichuan Province, China West Normal University,  
Nanchong 637000, China*

\*Corresponding author: wyao1011@163.com (Q. Zhang), xiupeiyang@cwnu.edu.cn

(X. Yang)

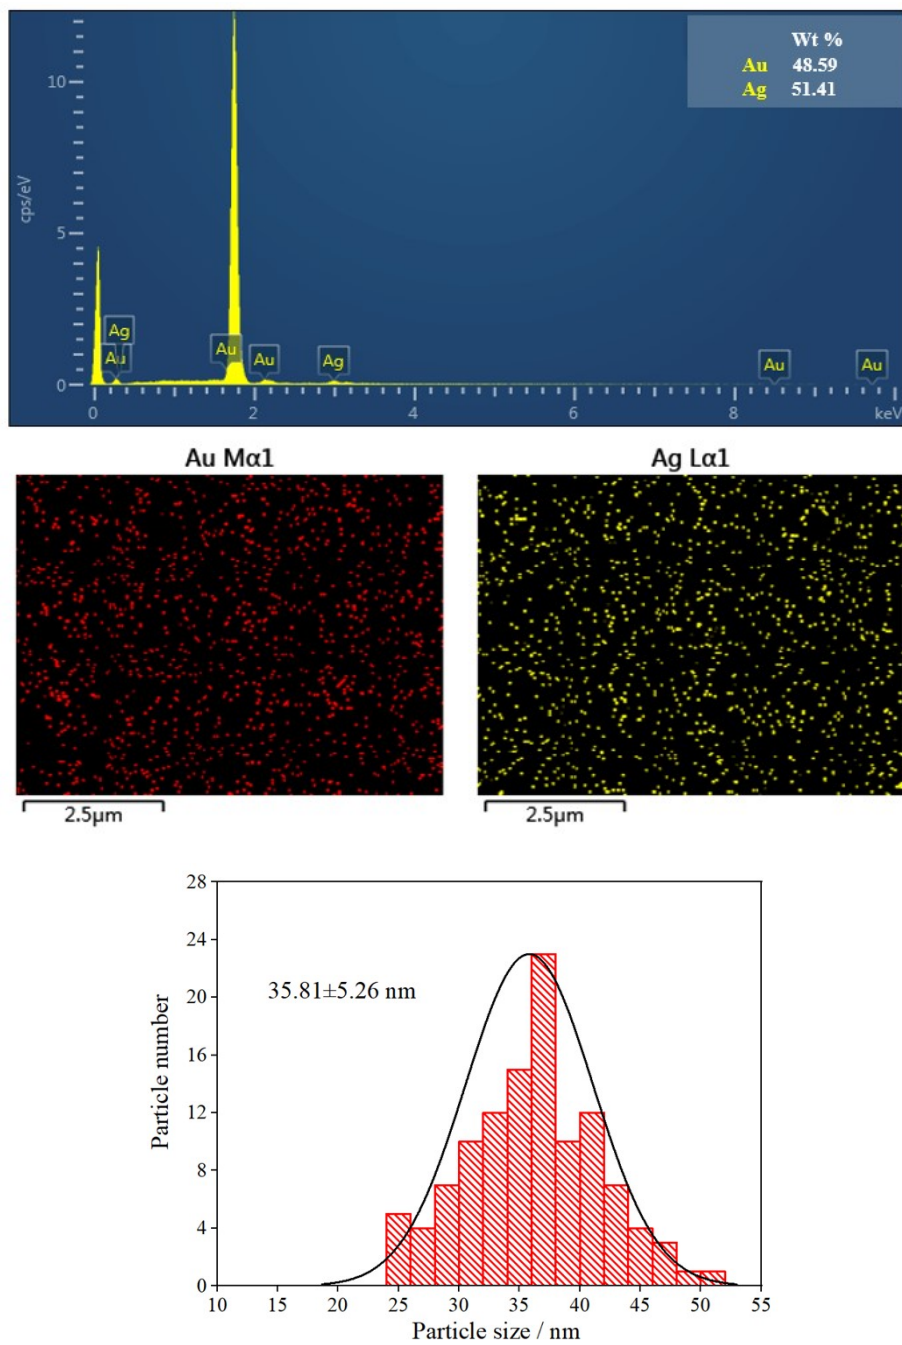

**Figure S1.** EDS spectrum, elemental mapping and the size distribution images of Si/Au@Ag.

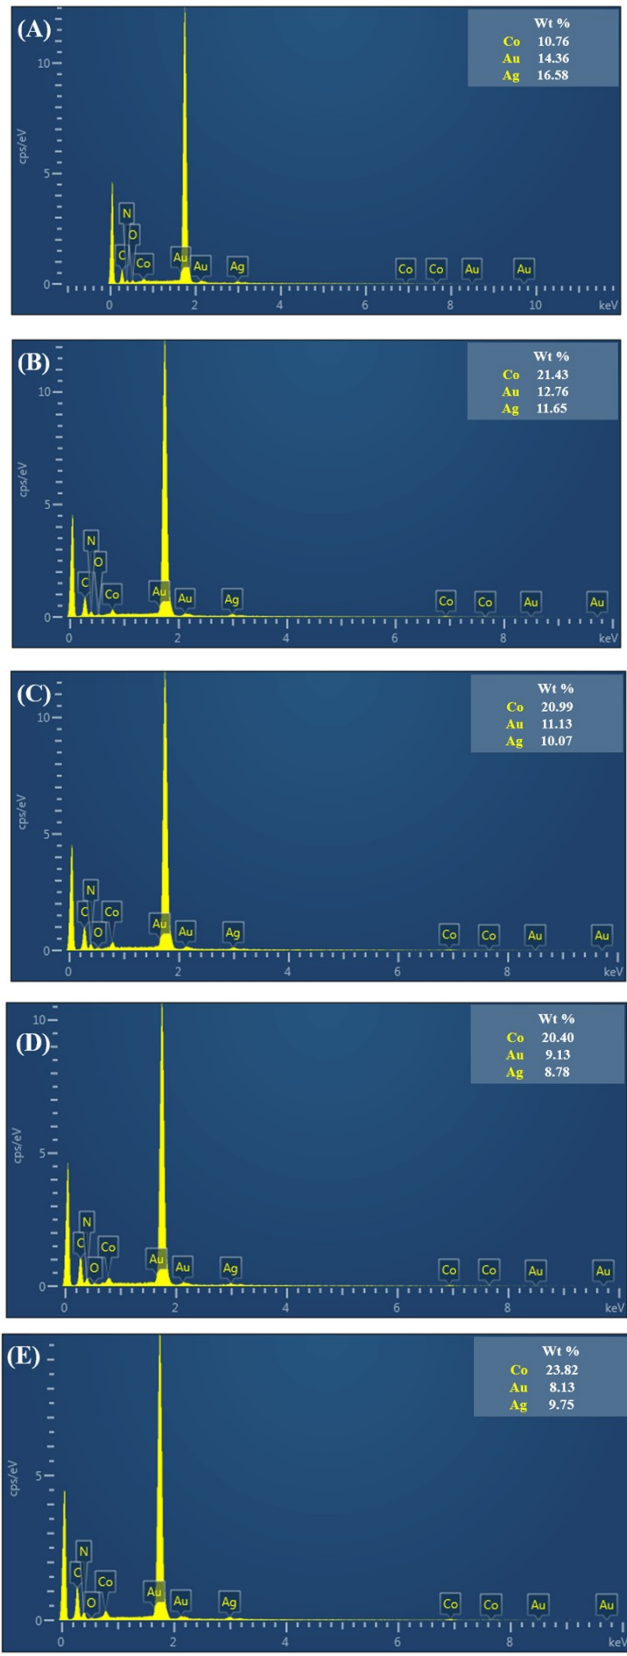

**Figure S2.** EDS spectra of various Si/Au@Ag/ZIF-67 substrates prepared with immersion times of (A) 10 min, (B) 20 min, (C)30 min, (D) 40 min and (E) 60 min.

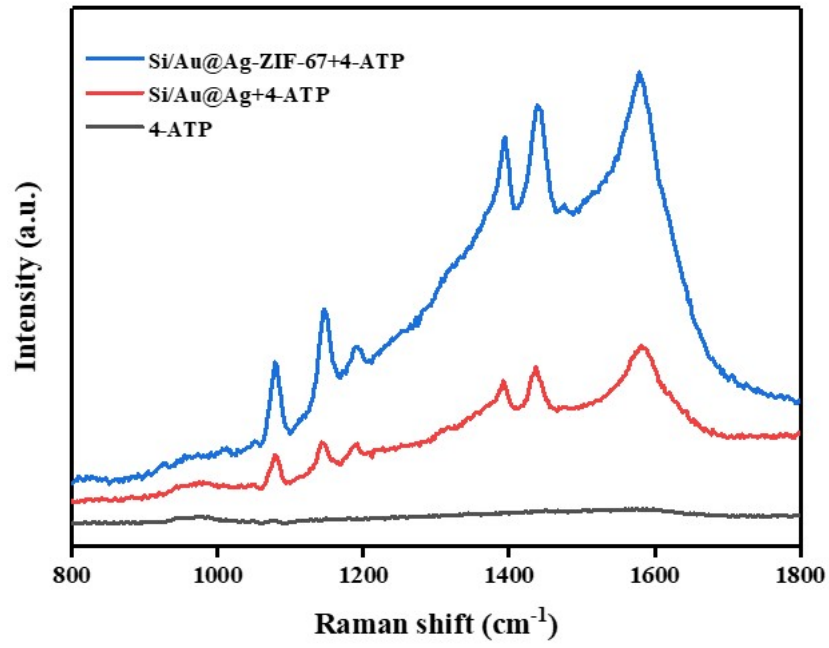

**Figure S3.** SERS spectra of 4-ATP exposed on Si/Au@Ag and Si/Au@Ag/ZIF-67 substrates.

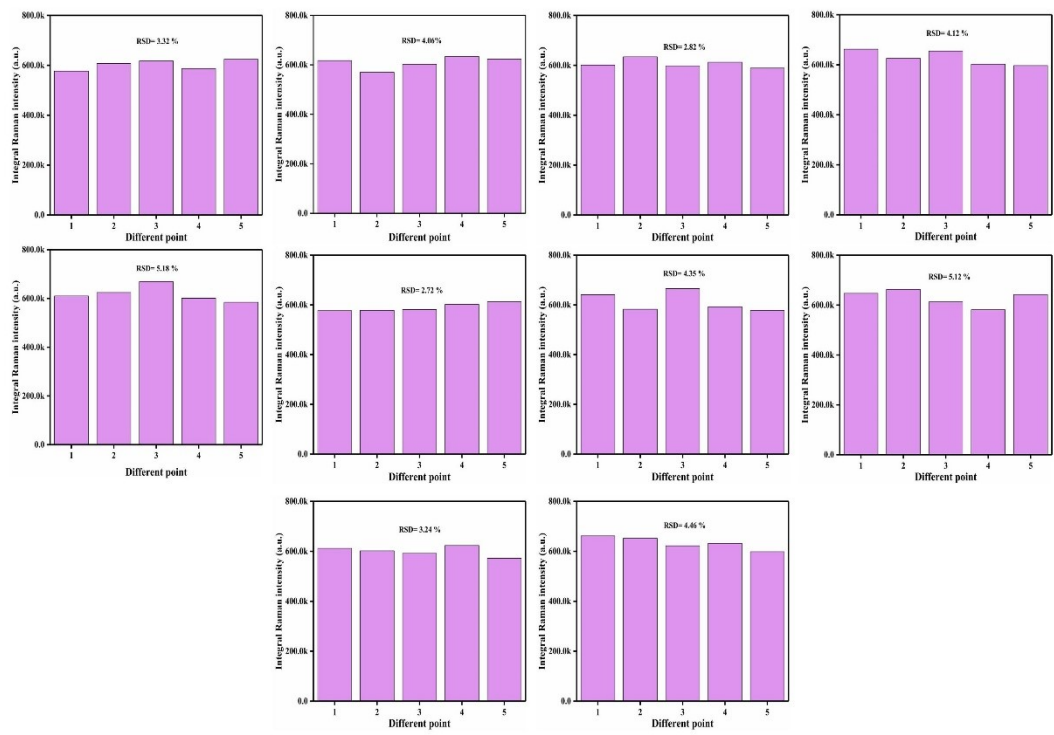

**Figure S4.** Integral Raman intensities of ten SERS substrates in contact with 1 mM 4-ATP. Five points were detected on each substrate.

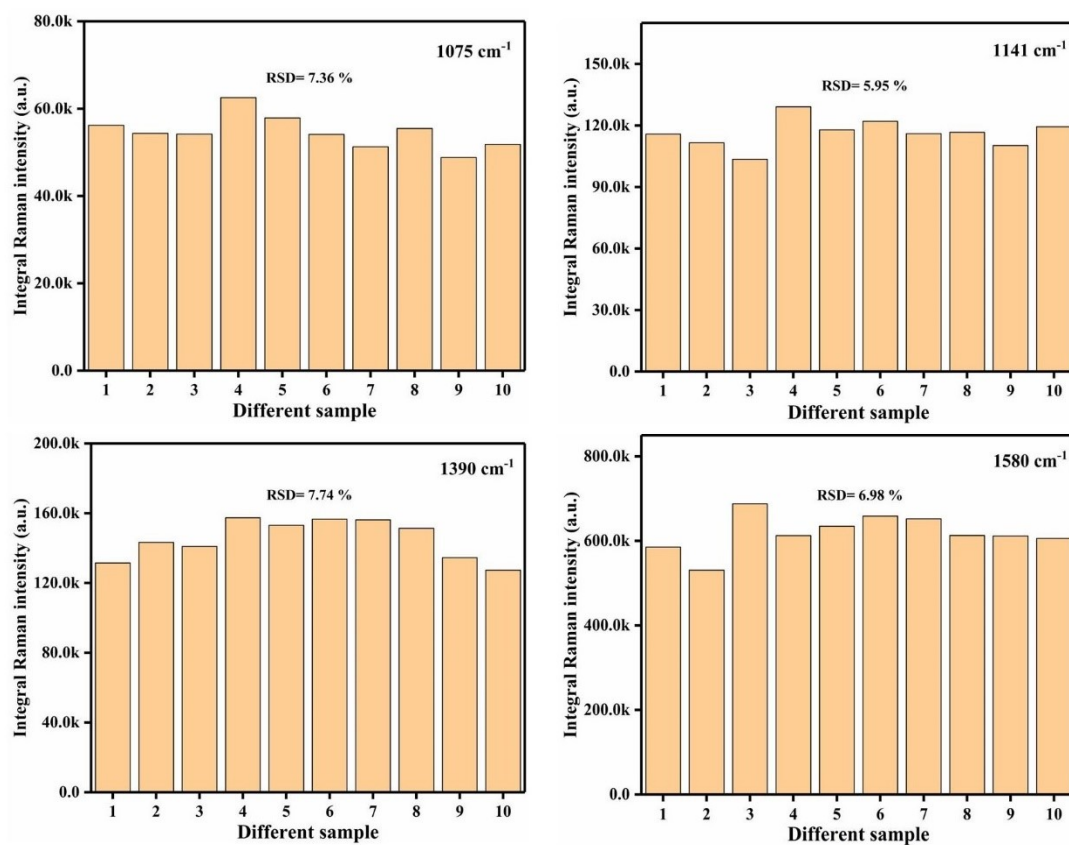

**Figure S5.** Intensities of the Raman peaks of 4-ATP at 1075, 1141, 1390 and 1580 cm<sup>-1</sup> in 10 different sample.
